# Supplementary material for: Host-induced silencing of the CpCHI gene resulted in developmental abnormalities and mortality in maize stem borer (Chilo partellus)
Source: PubMed Central journal article supplement (PMC9901779; doi:10.1371/journal.pone.0280963), 2023-02-06
Supplement: pone.0280963.s002.pdf [file pone.0280963.s002.pdf]

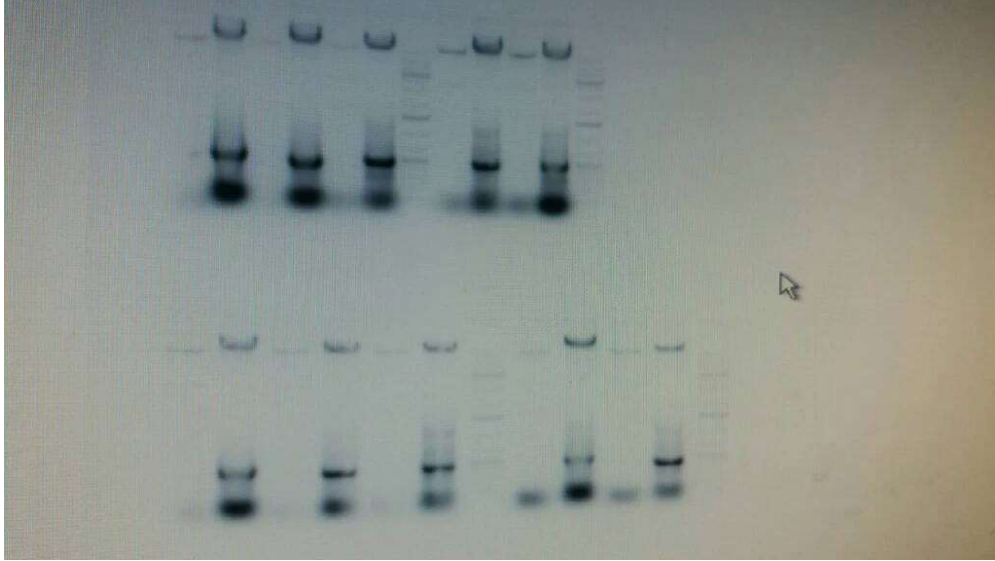

S3\_raw\_images

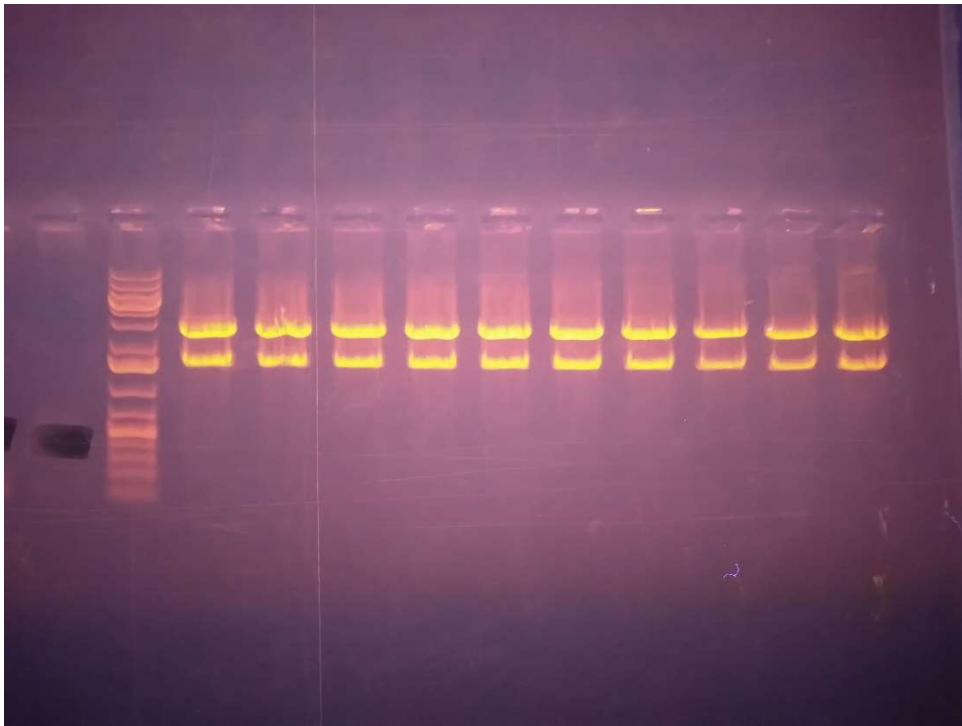

S4 (A)\_raw\_images

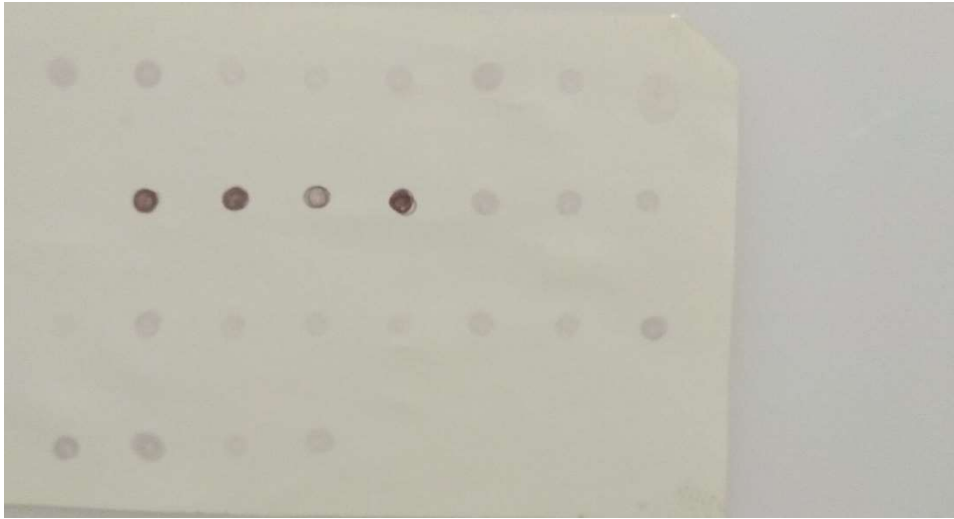

S5 Fig. (A) \_raw\_images

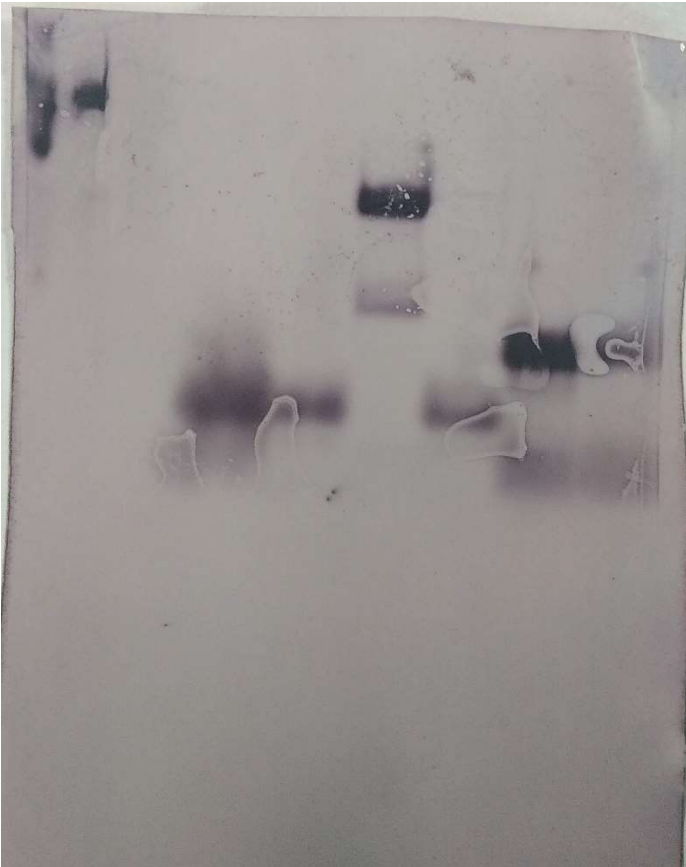

S5 Fig. (B) \_raw\_images
